# Supplementary material for: Nanostructured nickel–cobalt alloy/rGO-SWCNT thin film as an efficient electrocatalyst for hydrogen evolution reactions
Source: Royal Society of Chemistry journal article supplement (doi:10.1039/d4nj01973c), 2024-01-01
Supplement: d4nj01973c1.pdf [file d4nj01973c1.pdf]

### Nanostructured nickel-cobalt alloy/GMS-SWCNT thin film as an efficient electrocatalyst for hydrogen evolution reaction

Qing Wan<sup>1</sup>, Congming Tang<sup>1</sup>, Kai Ma<sup>2</sup>, and Xinli Li<sup>1\*</sup>

(<sup>1</sup>School of Chemistry and Chemical Engineering, Chongqing University of Technology, Chongqing 400054, PR China; <sup>2</sup>Synthetic Lubricants Research Institute of Sinopec Lubricant Co., Ltd., Chongqing 400039, PR China)

Table S1 Deposition bath composition and mass loading for various electrodeposited catalysts

| Film   | CoSO <sub>4</sub> /M | NiSO <sub>4</sub> /M | Co/mg | Ni/mg | Loading/mg |
|--------|----------------------|----------------------|-------|-------|------------|
| Co     | 0.12                 | -                    | 5.5   | -     | 5.5        |
| Ni     | -                    | 0.12                 | -     | 5.3   | 5.3        |
| CoNi12 | 0.04                 | 0.08                 | 1.48  | 2.92  | 4.4        |
| CoNi11 | 0.06                 | 0.06                 | 2.48  | 2.52  | 5.0        |
| CoNi21 | 0.08                 | 0.04                 | 3.08  | 1.72  | 4.8        |
| CoNi31 | 0.09                 | 0.03                 | 3.07  | 1.03  | 4.1        |

Table S2 Performances of CoNi21/rGO-SWCNT together with other related catalysts for HER process

\*Corresponding author. Tel.: +86 23 62563250, E-mail address: lixinlitcm@163.com (X. L. Li).

| Material                                                                          | Mass loading (mg /cm <sup>2</sup> ) | Supports  | Tafel Slope (mV/dec) | j(mA/cm <sup>2</sup> ) | $\eta$ at j (mV) | Electrolyte | Ref.                                               |
|-----------------------------------------------------------------------------------|-------------------------------------|-----------|----------------------|------------------------|------------------|-------------|----------------------------------------------------|
| CoNi21                                                                            | 4.8                                 | rGO/SWCNT | 112.55               | 10/100                 | 83.5/291.8       | 1.0 M KOH   | This work                                          |
| Cu–Ni foam (50 wt% Ni)                                                            | -                                   | Cu–Ni     | 97                   | 10                     | 229              | 1.0 M KOH   | B. Mater. Sci. 2023, 46 (1), 9                     |
| CoSe <sub>2</sub> /Co <sub>3</sub> S <sub>4</sub> @Co <sub>3</sub> O <sub>4</sub> | -                                   | -         | 117.7                | 10                     | 165              | 1.0 M KOH   | Small 2023, 19 (35), 2302056                       |
| Ni–Mo/ESS                                                                         | 3.0                                 | ESS       | 97.14                | 10                     | 53               | 1.0 M KOH   | Energy Technology 2023, 11 (8), 2300118            |
| FeNiS <sub>2</sub>                                                                | -                                   | -         | 104                  | 10                     | 141              | 1.0 M KOH   | ChemistrySelect 2023, 8 (13), e202204370           |
| CC@MoS <sub>2</sub> /RuNPs                                                        | -                                   | CC        | 104.8                | 10                     | 71.3             | 1.0 M KOH   | J. Mater. Eng. 2022, 50 (4), 44-52                 |
| 1T 0.81MoS <sub>2</sub> @Ni <sub>2</sub> P                                        | 3.0                                 | CC        | 42                   | 10                     | 95               | 1.0 M KOH   | Nat. Commun. 2021, 12 (1), 5260 -5272              |
| Ni/MoN@NCNT/CC                                                                    | 2.7                                 | CC        | 93                   | 10                     | 207              | 1.0 M KOH   | Nat. Commun. 2021, 12 (1), 5260 -5272              |
| Re/ReS <sub>2</sub> /CC                                                           | -                                   | CC        | 53                   | 10                     | 44               | 1.0 M KOH   | ChemElectroChem 2020, 7 (3), 745-752               |
| CoNi film                                                                         | 1.98                                | Cu rod    | 124                  | 10                     | 67               | 1.0 M KOH   | Int. J. Hydrogen Energ. 2022, 47 (75), 32145-32157 |

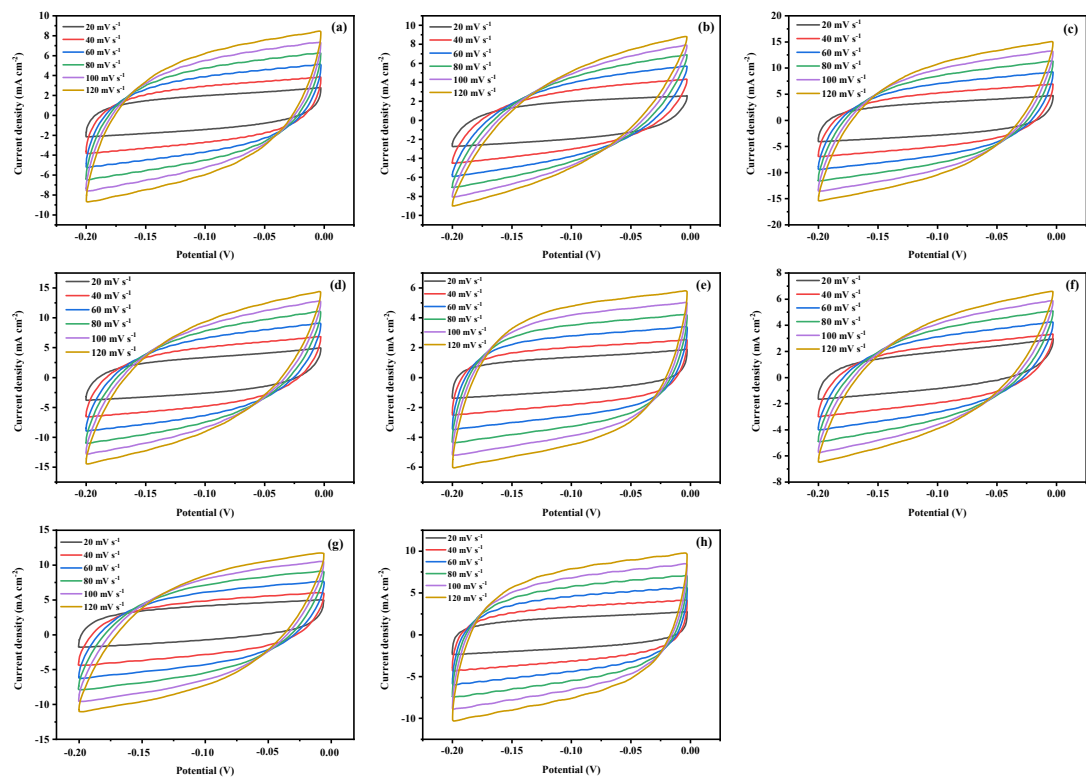

**Fig. S1.** Cyclic voltammogram curves of (a) CoNi12, (b) CoNi11, (c) CoNi21, (d) CoNi31, (e) Co, (f) Ni, (g)Pt/C, (h) Blank in the potential window of -0.2 V - 0 V vs. RHE at different scan rates.

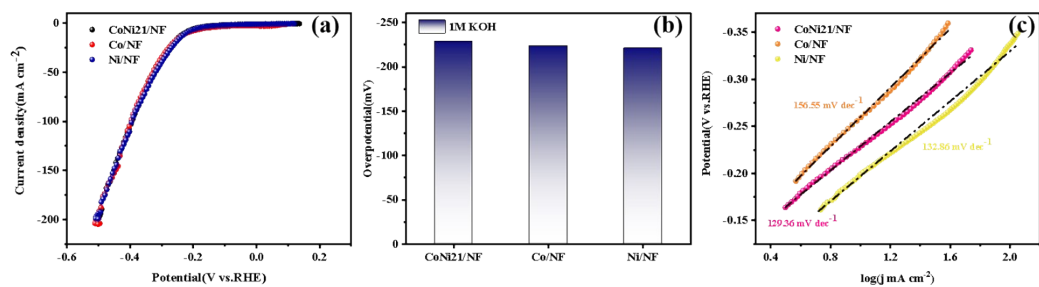

**Fig. S2.** HER activity over the electrodeposited CoNi21 as well as pure Co and Ni onto Nickel foam (NF).

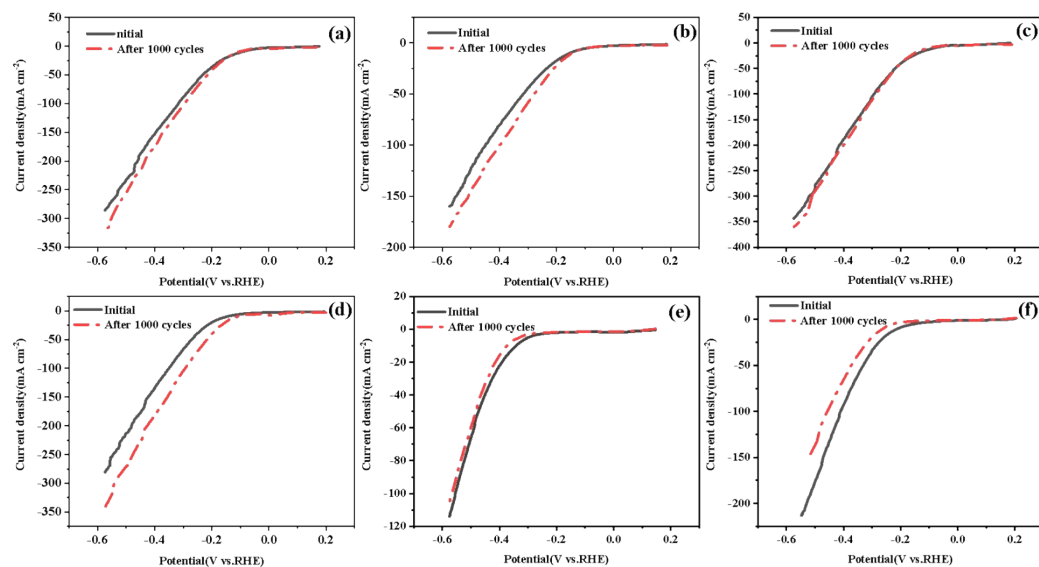

**Fig. S3.** LSV curves of catalyst at first and after 1000 voltammetry cycles: a) CoNi12; b) CoNi11; c) CoNi21; d) CoNi31; e) Co; f) Ni.
